# Supplementary material
Source: PubMed Central journal article supplement (PMC3562702)
Supplement: NIHMS399103-supplement-supplement_1.pdf [file NIHMS399103-supplement-supplement_1.pdf]

## SUPPLEMENTAL MATERIAL

### **An increased burden of common and rare lipid-associated risk alleles contributes to the phenotypic spectrum of hypertriglyceridemia**

Running title: Complexity of hypertriglyceridemia

Christopher T. Johansen,<sup>1</sup> Jian Wang,<sup>1</sup> Matthew B. Lanktree,<sup>1</sup> Adam D. McIntyre,<sup>1</sup> Matthew R. Ban,<sup>1</sup> Rebecca A. Martins,<sup>1</sup> Brooke A. Kennedy,<sup>1</sup> Reina G. Hassell,<sup>1</sup> Maartje E. Visser,<sup>2,3</sup> Stephen M. Schwartz,<sup>4</sup> Benjamin F. Voight,<sup>5,6</sup> Roberto Elosua,<sup>7</sup> Veikko Salomaa,<sup>8</sup> Christopher J. O'Donnell,<sup>9,10,11</sup> Geesje M. Dallinga-Thie,<sup>2,3</sup> Sonia S. Anand,<sup>12</sup> Salim Yusuf,<sup>12</sup> Murray W. Huff,<sup>1,13</sup> Sekar Kathiresan,<sup>5,6</sup> Henian Cao<sup>1</sup> and Robert A. Hegele<sup>1,13\*</sup>

<sup>1</sup>Department of Biochemistry, Robarts Research Institute, University of Western Ontario, London, Ontario N6A 5K8, Canada; <sup>2</sup>Department of Experimental Vascular Medicine, Academic Medical Center Amsterdam, Amsterdam 1105AZ, Netherlands; <sup>3</sup>Department of Vascular Medicine, Academic Medical Center Amsterdam, Amsterdam 1105AZ, Netherlands; <sup>4</sup>Cardiovascular Health Research Unit, University of Washington, Seattle, Washington 98101, USA; <sup>5</sup>Center for Human Genetic Research and Cardiovascular Research Center, Massachusetts General Hospital, Boston 02114, Massachusetts, USA; <sup>6</sup>Program in Medical and Population Genetics, Broad Institute of MIT and Harvard, Cambridge 02142, Massachusetts, USA; <sup>7</sup>Cardiovascular Epidemiology and Genetics, Institut Municipal d'Investigacio Medica, and CIBER Epidemiologia y Salud Publica, Barcelona 08003, Spain; <sup>8</sup>Chronic Disease Epidemiology Unit, Department of Health Promotion and Chronic Disease Prevention, National Institute for Health and Welfare, Helsinki 00300, Finland; <sup>9</sup>Cardiovascular Research Center and Cardiology Division, Massachusetts General Hospital, Harvard Medical School, Boston 02114, Massachusetts, USA; <sup>10</sup>Department of Medicine, Harvard Medical School, Boston 02114, Massachusetts, USA; <sup>11</sup>Framingham Heart Study, National, Heart, Lung, and Blood Institute, Framingham 01702, Massachusetts, USA; <sup>12</sup>Population Health Research Institute, Hamilton Health Sciences, McMaster University, Hamilton, Ontario L8L 2X2, Canada; <sup>13</sup>Department of Medicine, Schulich School of Medicine and Dentistry, University of Western Ontario, London, Ontario N6A 5K8, Canada. \*Corresponding author (hegele@robarts.ca).

#### **Corresponding Author:**

Robert A. Hegele MD FRCPC FACP  
Blackburn Cardiovascular Genetics Laboratory  
Robarts Research Institute, University of Western Ontario  
London, Ontario, Canada, N6A 5K8  
Tel: 519-931-5271; Fax: 519-931-5218; E-mail: [hegele@robarts.ca](mailto:hegele@robarts.ca)

**Supplemental Table I. The Fredrickson or World Health Organization HLP phenotype classification system.**

| Familial hyperlipidemia       | WHO classification | MIM    | Inheritance | Diagnostic components |                        |                                                                                                                                     |
|-------------------------------|--------------------|--------|-------------|-----------------------|------------------------|-------------------------------------------------------------------------------------------------------------------------------------|
|                               |                    |        |             | TG (mmol/L)           | Lipoproteins           | Other components                                                                                                                    |
| Chylomicronemia               | HLP type 1         | 238600 | Monogenic   | >10                   | ↑CM                    | Homozygous mutations in <i>LPL</i> , <i>APOC2</i> , <i>APOA5</i> , <i>LMF1</i> and <i>GPIHBP1</i>                                   |
| Hypercholesterolemia          | HLP type 2A        | 143890 | Monogenic   | <3.4                  | ↑LDL                   | Heterozygous form: mutations in <i>LDLR</i> , <i>APOB</i> or <i>PCSK9</i> ; homozygous form: mutations in <i>LDLR</i> or <i>ARH</i> |
| Combined hyperlipoproteinemia | HLP type 2B        | 144250 | Polygenic   | 3.4-10                | ↑VLDL ↑LDL             | LDL cholesterol >95 <sup>th</sup> percentile                                                                                        |
| Dysbetalipoproteinemia        | HLP type 3         | 107741 | Polygenic   | 3.4-10                | ↑VLDL-remnants<br>↑IDL | Predominantly <i>APOE</i> ε2/ε2 genotype                                                                                            |
| Primary hypertriglyceridemia  | HLP type 4         | 144600 | Polygenic   | 3.4-10                | ↑VLDL                  |                                                                                                                                     |
| Mixed hyperlipidemia          | HLP type 5         | 144650 | Polygenic   | >10                   | ↑CM ↑VLDL              |                                                                                                                                     |

*APOB*, apolipoprotein B; *APOC2*, apolipoprotein C-II; *APOE*, apolipoprotein E; CM, chylomicron; HLP, hyperlipoproteinemia; IDL, intermediate-density lipoprotein; LDL, low-density lipoprotein; LDL-C, low-density lipoprotein cholesterol; *LDLR*, low-density lipoprotein receptor; *LPL*, lipoprotein lipase; MIM, Mendelian Inheritance in Man; *PCSK9*, proprotein convertase subtilisin/kexin type 9; TG, triglyceride; VLDL, very low-density lipoprotein; WHO, World Health Organization

**Supplemental Table II. Replication of HDL-C-associated loci in patients with polygenic HTG and HLP-HTG phenotypes.**

| CHR | Gene    | SNP        | Minor allele/<br>modeled allele | All HTG (n=504)  |                      | HLP type 5 (n=180) |         | HLP type 4 (n=128) |                      | HLP type 3 (n=37) |         | HLP type 2B (n=159) |                      |
|-----|---------|------------|---------------------------------|------------------|----------------------|--------------------|---------|--------------------|----------------------|-------------------|---------|---------------------|----------------------|
|     |         |            |                                 | OR (95% CI)      | P-value              | OR (95% CI)        | P-value | OR (95% CI)        | P-value              | OR (95% CI)       | P-value | OR (95% CI)         | P-value              |
| 7   | MLXIPL  | rs17145738 | T/C                             | 2.28 (1.63-3.19) | 1.5X10 <sup>-6</sup> | 1.93 (1.16-3.19)   | 0.011   | 3.63 (1.75-7.54)   | 5.4X10 <sup>-4</sup> | 1.38 (0.55-3.49)  | 0.49    | 2.17 (1.32-3.57)    | 2.3X10 <sup>-3</sup> |
| 8   | TRIB1   | rs10808546 | T/C                             | 1.46 (1.21-1.77) | 1.0X10 <sup>-4</sup> | 1.32 (0.98-1.77)   | 0.07    | 1.43 (1.03-1.98)   | 0.032                | 1.56 (0.87-2.79)  | 0.14    | 1.57 (1.18-2.09)    | 1.9X10 <sup>-3</sup> |
| 2   | IRS1    | rs1515100  | C/A                             | 1.28 (1.05-1.55) | 0.015                | 1.22 (0.90-1.65)   | 0.20    | 1.53 (1.07-2.18)   | 0.018                | 0.98 (0.54-1.79)  | 0.95    | 1.26 (0.95-1.68)    | 0.11                 |
| 11  | FADS1   | rs174601   | T/T                             | 1.25 (1.04-1.50) | 0.019                | 1.21 (0.91-1.62)   | 0.20    | 1.46 (1.05-2.01)   | 0.023                | 1.16 (0.64-2.12)  | 0.63    | 1.17 (0.89-1.54)    | 0.27                 |
| 19  | APOE    | rs4420638  | G/G                             | 0.62 (0.4-0.95)  | 0.029                | 0.73 (0.38-1.38)   | 0.33    | 0.50 (0.22-1.14)   | 0.10                 | 0.58 (0.13-2.52)  | 0.47    | 0.65 (0.34-1.23)    | 0.19                 |
| 16  | CETP    | rs3764261  | A/C                             | 1.23 (1.00-1.50) | 0.051                | 1.26 (0.91-1.73)   | 0.16    | 1.26 (0.89-1.80)   | 0.20                 | 0.82 (0.44-1.52)  | 0.52    | 1.36 (1.00-1.85)    | 0.050                |
| 6   | CITED2  | rs605066   | C/C                             | 1.20 (1.00-1.45) | 0.052                | 1.13 (0.85-1.50)   | 0.41    | 1.21 (0.87-1.66)   | 0.25                 | 1.50 (0.84-2.67)  | 0.17    | 1.25 (0.95-1.64)    | 0.11                 |
| 1   | GALNT2  | rs4846914  | G/G                             | 1.21 (1.00-1.45) | 0.052                | 1.29 (0.97-1.73)   | 0.084   | 1.14 (0.82-1.58)   | 0.45                 | 1.16 (0.64-2.09)  | 0.63    | 1.09 (0.83-1.45)    | 0.53                 |
| 9   | TTC39B  | rs643531   | C/C                             | 0.77 (0.59-1.01) | 0.059                | 1.05 (0.70-1.56)   | 0.82    | 0.68 (0.41-1.12)   | 0.13                 | 0.49 (0.17-1.41)  | 0.19    | 0.78 (0.52-1.18)    | 0.25                 |
| 6   | LPA     | rs1084651  | A/A                             | 0.83 (0.64-1.07) | 0.16                 | 0.82 (0.54-1.23)   | 0.33    | 1.03 (0.67-1.58)   | 0.91                 | 0.57 (0.23-1.40)  | 0.22    | 0.81 (0.55-1.19)    | 0.28                 |
| 19  | ANGPTL4 | rs7255436  | C/C                             | 1.15 (0.94-1.40) | 0.18                 | 0.93 (0.68-1.26)   | 0.63    | 1.20 (0.85-1.69)   | 0.31                 | 1.32 (0.71-2.49)  | 0.38    | 1.25 (0.93-1.69)    | 0.14                 |
| 20  | PLTP    | rs6065906  | C/C                             | 1.17 (0.92-1.48) | 0.20                 | 1.38 (0.96-1.97)   | 0.082   | 1.10 (0.72-1.67)   | 0.66                 | 0.62 (0.25-1.56)  | 0.31    | 1.14 (0.80-1.64)    | 0.47                 |
| 1   | ZNF648  | rs1689800  | G/G                             | 1.13 (0.93-1.37) | 0.21                 | 1.05 (0.77-1.43)   | 0.76    | 0.96 (0.68-1.36)   | 0.81                 | 1.30 (0.71-2.39)  | 0.39    | 1.42 (1.07-1.90)    | 0.017                |
| 12  | MVK     | rs7134594  | C/C                             | 0.90 (0.75-1.08) | 0.24                 | 0.87 (0.66-1.16)   | 0.35    | 1.08 (0.79-1.48)   | 0.64                 | 1.10 (0.63-1.91)  | 0.75    | 0.83 (0.63-1.09)    | 0.19                 |
| 12  | LRP1    | rs3741414  | T/C                             | 1.14 (0.91-1.43) | 0.25                 | 1.44 (1.00-2.07)   | 0.051   | 0.99 (0.68-1.44)   | 0.97                 | 1.12 (0.56-2.26)  | 0.75    | 1.15 (0.82-1.60)    | 0.42                 |
| 11  | UBASH3B | rs7115089  | G/C                             | 1.12 (0.93-1.34) | 0.25                 | 1.24 (0.92-1.67)   | 0.16    | 1.26 (0.90-1.76)   | 0.17                 | 1.23 (0.70-2.17)  | 0.48    | 0.88 (0.67-1.15)    | 0.35                 |
| 20  | HNF4A   | rs1800961  | T/T                             | 0.75 (0.44-1.28) | 0.29                 | 0.42 (0.14-1.21)   | 0.11    | 1.52 (0.70-3.29)   | 0.28                 | 0.56 (0.07-4.33)  | 0.58    | 0.83 (0.38-1.78)    | 0.62                 |
| 7   | KLF14   | rs4731702  | T/C                             | 0.91 (0.76-1.09) | 0.31                 | 1.00 (0.75-1.33)   | 0.99    | 0.80 (0.59-1.10)   | 0.17                 | 0.76 (0.43-1.33)  | 0.34    | 0.98 (0.75-1.28)    | 0.83                 |
| 8   | PPP1R3B | rs9987289  | A/A                             | 1.17 (0.84-1.64) | 0.35                 | 1.09 (0.65-1.83)   | 0.76    | 1.03 (0.58-1.83)   | 0.92                 | 2.59 (1.18-5.68)  | 0.018   | 0.86 (0.50-1.48)    | 0.57                 |
| 22  | UBE2L3  | rs181362   | T/T                             | 0.90 (0.71-1.14) | 0.39                 | 0.85 (0.59-1.23)   | 0.38    | 1.15 (0.77-1.69)   | 0.50                 | 0.57 (0.25-1.29)  | 0.18    | 0.80 (0.55-1.15)    | 0.23                 |
| 18  | LIPG    | rs7241918  | G/G                             | 0.90 (0.71-1.15) | 0.40                 | 1.02 (0.70-1.48)   | 0.91    | 0.90 (0.58-1.37)   | 0.61                 | 0.68 (0.29-1.57)  | 0.36    | 0.90 (0.63-1.29)    | 0.58                 |
| 12  | SBNO1   | rs4759375  | T/C                             | 1.16 (0.78-1.72) | 0.47                 | 1.50 (0.75-3.01)   | 0.25    | 1.71 (0.78-3.77)   | 0.18                 | 0.48 (0.18-1.27)  | 0.14    | 0.71 (0.42-1.19)    | 0.19                 |
| 17  | PGS1    | rs4082919  | G/G                             | 1.07 (0.89-1.28) | 0.47                 | 1.17 (0.89-1.55)   | 0.26    | 1.22 (0.90-1.67)   | 0.20                 | 0.82 (0.46-1.45)  | 0.49    | 1.00 (0.76-1.31)    | 1.00                 |
| 15  | LIPC    | rs1532085  | A/G                             | 1.07 (0.89-1.29) | 0.49                 | 0.99 (0.74-1.32)   | 0.95    | 1.51 (1.08-2.11)   | 0.016                | 0.78 (0.45-1.35)  | 0.37    | 1.05 (0.80-1.38)    | 0.74                 |
| 4   | SLC39A8 | rs13107325 | T/T                             | 0.89 (0.64-1.25) | 0.49                 | 0.60 (0.33-1.09)   | 0.093   | 1.15 (0.67-1.99)   | 0.61                 | 0.75 (0.25-2.24)  | 0.60    | 1.00 (0.62-1.64)    | 0.99                 |
| 15  | LACTB   | rs2652834  | A/A                             | 0.93 (0.73-1.19) | 0.56                 | 0.90 (0.60-1.33)   | 0.59    | 1.18 (0.79-1.76)   | 0.43                 | 0.77 (0.35-1.68)  | 0.51    | 0.78 (0.53-1.14)    | 0.20                 |
| 18  | MC4R    | rs12967135 | A/A                             | 0.94 (0.76-1.18) | 0.61                 | 0.91 (0.64-1.28)   | 0.58    | 1.11 (0.76-1.62)   | 0.59                 | 1.85 (0.99-3.48)  | 0.054   | 0.86 (0.61-1.21)    | 0.38                 |

|    |          |            |     |                  |      |                  |      |                  |                      |                  |       |                  |      |
|----|----------|------------|-----|------------------|------|------------------|------|------------------|----------------------|------------------|-------|------------------|------|
| 5  | ARL15    | rs6450176  | A/A | 0.95 (0.77-1.17) | 0.61 | 0.86 (0.61-1.21) | 0.38 | 1.00 (0.70-1.42) | 0.99                 | 0.73 (0.36-1.49) | 0.38  | 0.93 (0.68-1.26) | 0.64 |
| 2  | COBLL1   | rs12328675 | C/T | 1.07 (0.81-1.40) | 0.64 | 1.47 (0.93-2.34) | 0.10 | 0.93 (0.60-1.45) | 0.76                 | 1.13 (0.47-2.68) | 0.79  | 0.96 (0.65-1.41) | 0.82 |
| 11 | LRP4     | rs3136441  | C/T | 0.94 (0.73-1.23) | 0.67 | 1.26 (0.81-1.95) | 0.30 | 0.58 (0.38-0.87) | 8.0X10 <sup>-3</sup> | 1.08 (0.45-2.57) | 0.87  | 1.02 (0.69-1.49) | 0.94 |
| 19 | LOC55908 | rs737337   | C/C | 1.06 (0.77-1.45) | 0.72 | 0.93 (0.55-1.56) | 0.78 | 0.64 (0.34-1.22) | 0.17                 | 1.87 (0.86-4.07) | 0.12  | 1.21 (0.78-1.87) | 0.40 |
| 16 | LCAT     | rs16942887 | A/G | 1.05 (0.80-1.38) | 0.73 | 1.10 (0.71-1.72) | 0.66 | 1.15 (0.71-1.88) | 0.57                 | 0.67 (0.31-1.44) | 0.30  | 1.06 (0.71-1.59) | 0.76 |
| 6  | C6orf106 | rs2814944  | A/A | 1.05 (0.80-1.38) | 0.73 | 1.11 (0.73-1.69) | 0.63 | 0.95 (0.57-1.56) | 0.83                 | 0.83 (0.34-2.03) | 0.68  | 1.06 (0.71-1.60) | 0.76 |
| 1  | PABPC4   | rs4660293  | G/G | 1.04 (0.84-1.28) | 0.74 | 1.18 (0.85-1.63) | 0.32 | 0.96 (0.67-1.39) | 0.83                 | 0.56 (0.27-1.18) | 0.13  | 0.96 (0.70-1.33) | 0.82 |
| 12 | SCARB1   | rs838880   | C/T | 1.02 (0.84-1.24) | 0.82 | 0.92 (0.68-1.23) | 0.56 | 1.01 (0.72-1.41) | 0.97                 | 1.11 (0.62-1.99) | 0.73  | 1.15 (0.86-1.55) | 0.34 |
| 11 | AMPD3    | rs2923084  | G/G | 1.02 (0.81-1.28) | 0.86 | 1.04 (0.72-1.49) | 0.85 | 1.05 (0.71-1.57) | 0.81                 | 2.20 (1.17-4.12) | 0.014 | 0.95 (0.67-1.35) | 0.77 |
| 17 | STARD3   | rs881844   | C/C | 1.02 (0.84-1.23) | 0.86 | 0.84 (0.61-1.14) | 0.26 | 1.26 (0.91-1.74) | 0.17                 | 1.02 (0.55-1.89) | 0.96  | 1.12 (0.84-1.48) | 0.44 |
| 16 | CMIP     | rs2925979  | T/T | 0.99 (0.81-1.21) | 0.91 | 1.12 (0.83-1.51) | 0.47 | 1.13 (0.80-1.59) | 0.50                 | 0.62 (0.31-1.24) | 0.17  | 1.02 (0.76-1.38) | 0.89 |
| 8  | TRPS1    | rs2293889  | T/T | 0.99 (0.83-1.19) | 0.92 | 0.99 (0.75-1.31) | 0.94 | 0.97 (0.71-1.32) | 0.85                 | 1.21 (0.68-2.15) | 0.51  | 1.10 (0.84-1.44) | 0.50 |
| 12 | PDE3A    | rs7134375  | A/C | 0.99 (0.83-1.19) | 0.95 | 0.88 (0.66-1.18) | 0.40 | 1.26 (0.91-1.76) | 0.17                 | 0.98 (0.55-1.76) | 0.95  | 0.87 (0.66-1.14) | 0.31 |
| 12 | ZNF664   | rs4765127  | T/G | 1.00 (0.82-1.20) | 0.96 | 1.16 (0.86-1.58) | 0.34 | 0.91 (0.66-1.26) | 0.57                 | 1.44 (0.79-2.63) | 0.24  | 0.88 (0.67-1.17) | 0.38 |
| 17 | ABCA8    | rs4148008  | G/G | 1.00 (0.82-1.21) | 0.97 | 0.92 (0.68-1.26) | 0.61 | 0.99 (0.70-1.39) | 0.96                 | 1.58 (0.90-2.78) | 0.11  | 0.96 (0.71-1.28) | 0.77 |
| 9  | ABCA1    | rs1883025  | T/T | 1.00 (0.81-1.22) | 0.98 | 0.86 (0.62-1.21) | 0.39 | 1.20 (0.85-1.69) | 0.30                 | 0.61 (0.29-1.27) | 0.18  | 1.15 (0.85-1.55) | 0.36 |
| 19 | LILRA3   | rs386000   | C/G | 1.00 (0.80-1.25) | 1.00 | 1.02 (0.72-1.44) | 0.90 | 1.11 (0.74-1.65) | 0.62                 | 0.92 (0.47-1.79) | 0.80  | 0.98 (0.71-1.35) | 0.90 |

CHR, chromosome; CI, confidence interval; HLP, hyperlipoproteinemia; HTG, hypertriglyceridemia; Mb, megabases; NC, not calculated; OR, odds ratio; SNP, single nucleotide polymorphism; T2D, type 2 diabetes mellitus; TG, plasma triglyceride. The modeled allele is the TG-raising allele in the combined HTG cohort.

<sup>1</sup>Variant is monomorphic in HTG cases.

**Supplemental Table III. Replication of LDL-associated loci in patients with polygenic HTG and HLP-HTG phenotypes.**

| CHR | Gene    | SNP        | Minor allele/<br>modeled allele | All HTG (n=504)  |                      | HLP type 5 (n=180) |                      | HLP type 4 (n=128) |         | HLP type 3 (n=37) |                 | HLP type 2B (n=159) |                      |
|-----|---------|------------|---------------------------------|------------------|----------------------|--------------------|----------------------|--------------------|---------|-------------------|-----------------|---------------------|----------------------|
|     |         |            |                                 | OR (95% CI)      | P-value              | OR (95% CI)        | P-value              | OR (95% CI)        | P-value | OR (95% CI)       | P-value         | OR (95% CI)         | P-value              |
| 8   | TRIB1   | rs2954022  | A/C                             | 1.48 (1.23-1.8)  | 5.3X10 <sup>-5</sup> | 1.41 (1.05-1.89)   | 0.024                | 1.36 (0.98-1.88)   | 0.064   | 1.59 (0.89-2.84)  | 0.12            | 1.58 (1.19-2.10)    | 1.5X10 <sup>-3</sup> |
| 1   | ANGPTL3 | rs3850634  | G/T                             | 1.49 (1.21-1.83) | 1.7X10 <sup>-4</sup> | 1.77 (1.26-2.49)   | 1.1X10 <sup>-3</sup> | 0.97 (0.69-1.37)   | 0.87    | 1.24 (0.66-2.32)  | 0.50            | 1.61 (1.17-2.20)    | 3. X10 <sup>-3</sup> |
| 7   | DNAH11  | rs12670798 | C/C                             | 1.39 (1.13-1.70) | 1.7X10 <sup>-3</sup> | 1.26 (0.92-1.74)   | 0.15                 | 1.41 (0.98-2.02)   | 0.062   | 1.30 (0.70-2.43)  | 0.41            | 1.32 (0.97-1.78)    | 0.076                |
| 2   | ABCG5/8 | rs4299376  | G/G                             | 1.33 (1.07-1.65) | 0.011                | 1.18 (0.84-1.67)   | 0.34                 | 1.50 (1.04-2.17)   | 0.032   | 1.14 (0.59-2.21)  | 0.69            | 1.47 (1.07-2.02)    | 0.019                |
| 19  | LDLR    | rs6511720  | T/G                             | 1.84 (1.12-3.03) | 0.017                | 1.56 (0.75-3.24)   | 0.23                 | 4.35 (1.30-14.6)   | 0.017   | NC <sup>1</sup>   | NC <sup>1</sup> | 1.46 (0.74-2.88)    | 0.27                 |
| 9   | ABO     | rs649129   | T/T                             | 1.27 (1.04-1.56) | 0.021                | 1.34 (0.96-1.85)   | 0.082                | 1.14 (0.79-1.65)   | 0.49    | 1.26 (0.66-2.40)  | 0.49            | 1.53 (1.13-2.07)    | 5.7X10 <sup>-3</sup> |
| 5   | HMGCR   | rs12916    | C/C                             | 1.23 (1.02-1.48) | 0.028                | 1.12 (0.84-1.50)   | 0.44                 | 1.27 (0.93-1.74)   | 0.14    | 1.35 (0.78-2.34)  | 0.29            | 1.16 (0.88-1.52)    | 0.29                 |
| 11  | FADS1   | rs174583   | T/C                             | 0.81 (0.68-0.98) | 0.029                | 0.84 (0.62-1.12)   | 0.23                 | 0.72 (0.52-0.99)   | 0.046   | 0.78 (0.43-1.41)  | 0.41            | 0.87 (0.66-1.15)    | 0.33                 |
| 19  | APOE    | rs4420638  | G/G                             | 0.62 (0.4-0.95)  | 0.029                | 0.73 (0.38-1.38)   | 0.33                 | 0.50 (0.22-1.14)   | 0.10    | 0.58 (0.13-2.52)  | 0.47            | 0.65 (0.34-1.23)    | 0.19                 |
| 16  | CETP    | rs247616   | T/C                             | 1.24 (1.01-1.51) | 0.041                | 1.23 (0.89-1.68)   | 0.21                 | 1.28 (0.90-1.83)   | 0.17    | 0.79 (0.42-1.47)  | 0.46            | 1.36 (1.00-1.85)    | 0.049                |
| 1   | PCSK9   | rs2479409  | G/G                             | 1.21 (1.00-1.45) | 0.045                | 1.14 (0.85-1.53)   | 0.38                 | 1.38 (1.00-1.90)   | 0.052   | 1.32 (0.74-2.37)  | 0.35            | 1.22 (0.92-1.60)    | 0.17                 |
| 5   | TIMD4   | rs6882076  | T/C                             | 1.21 (1.00-1.46) | 0.051                | 1.17 (0.87-1.58)   | 0.30                 | 1.15 (0.83-1.59)   | 0.40    | 0.88 (0.50-1.55)  | 0.66            | 1.59 (1.18-2.14)    | 2.4X10 <sup>-3</sup> |
| 1   | SORT1   | rs629301   | G/T                             | 1.18 (0.94-1.49) | 0.16                 | 0.93 (0.65-1.31)   | 0.66                 | 1.05 (0.71-1.55)   | 0.80    | 1.33 (0.63-2.82)  | 0.45            | 1.43 (0.99-2.06)    | 0.059                |
| 7   | NPC1L1  | rs217386   | A/G                             | 1.13 (0.94-1.35) | 0.19                 | 1.02 (0.77-1.34)   | 0.91                 | 1.12 (0.83-1.53)   | 0.46    | 0.62 (0.35-1.07)  | 0.087           | 1.39 (1.06-1.82)    | 0.017                |
| 1   | IRF2BP2 | rs514230   | A/T                             | 1.13 (0.94-1.35) | 0.20                 | 1.26 (0.94-1.67)   | 0.12                 | 1.08 (0.80-1.46)   | 0.63    | 1.32 (0.74-2.35)  | 0.34            | 1.03 (0.79-1.35)    | 0.81                 |
| 6   | LPA     | rs1564348  | C/C                             | 1.15 (0.90-1.47) | 0.27                 | 1.11 (0.76-1.63)   | 0.59                 | 1.15 (0.75-1.75)   | 0.53    | 1.36 (0.67-2.76)  | 0.40            | 1.16 (0.80-1.67)    | 0.43                 |
| 6   | HLA     | rs3177928  | A/A                             | 0.87 (0.68-1.13) | 0.30                 | 1.02 (0.69-1.50)   | 0.93                 | 0.79 (0.50-1.23)   | 0.30    | 1.49 (0.72-3.07)  | 0.28            | 0.79 (0.54-1.17)    | 0.24                 |
| 6   | MYLIP   | rs3757354  | T/C                             | 0.90 (0.72-1.13) | 0.36                 | 0.89 (0.64-1.26)   | 0.52                 | 0.65 (0.45-0.93)   | 0.017   | 0.96 (0.48-1.91)  | 0.90            | 1.30 (0.92-1.85)    | 0.14                 |
| 14  | NYNRIN  | rs2332328  | T/T                             | 0.92 (0.76-1.11) | 0.36                 | 0.9 (0.67-1.21)    | 0.48                 | 1.00 (0.73-1.38)   | 0.99    | 1.50 (0.80-2.82)  | 0.21            | 0.98 (0.74-1.30)    | 0.91                 |
| 8   | CYP7A1  | rs1030431  | A/A                             | 1.09 (0.90-1.32) | 0.38                 | 1.11 (0.82-1.50)   | 0.51                 | 1.46 (1.06-2.02)   | 0.02    | 1.22 (0.68-2.18)  | 0.51            | 0.92 (0.69-1.23)    | 0.57                 |
| 6   | HFE     | rs1800562  | A/G                             | 1.19 (0.81-1.75) | 0.38                 | 1.21 (0.66-2.23)   | 0.54                 | 1.54 (0.73-3.24)   | 0.25    | 0.36 (0.15-0.85)  | 0.019           | 1.46 (0.79-2.68)    | 0.22                 |
| 2   | APOB    | rs1367117  | A/A                             | 1.09 (0.90-1.32) | 0.39                 | 1.08 (0.80-1.47)   | 0.60                 | 0.88 (0.62-1.24)   | 0.45    | 0.77 (0.41-1.46)  | 0.42            | 1.38 (1.04-1.84)    | 0.026                |
| 8   | PLEC1   | rs11136341 | G/G                             | 1.09 (0.90-1.31) | 0.40                 | 0.94 (0.70-1.27)   | 0.71                 | 1.19 (0.86-1.64)   | 0.29    | 1.20 (0.66-2.17)  | 0.55            | 1.18 (0.89-1.56)    | 0.26                 |
| 6   | FRK     | rs11153594 | T/C                             | 1.08 (0.90-1.29) | 0.42                 | 0.89 (0.67-1.18)   | 0.41                 | 1.27 (0.93-1.74)   | 0.14    | 0.74 (0.43-1.29)  | 0.29            | 1.21 (0.92-1.59)    | 0.18                 |
| 10  | GPAM    | rs1129555  | A/A                             | 1.08 (0.88-1.32) | 0.45                 | 0.92 (0.67-1.27)   | 0.62                 | 0.94 (0.66-1.34)   | 0.74    | 1.50 (0.84-2.67)  | 0.17            | 1.17 (0.87-1.58)    | 0.30                 |
| 12  | HNF1A   | rs1169288  | C/C                             | 1.07 (0.88-1.31) | 0.50                 | 0.99 (0.72-1.35)   | 0.94                 | 1.06 (0.76-1.50)   | 0.72    | 1.30 (0.71-2.38)  | 0.39            | 1.07 (0.79-1.45)    | 0.66                 |
| 17  | OSBPL7  | rs7225700  | T/C                             | 0.94 (0.78-1.14) | 0.55                 | 1.25 (0.92-1.69)   | 0.15                 | 1.01 (0.72-1.42)   | 0.95    | 0.61 (0.35-1.07)  | 0.083           | 0.71 (0.54-0.93)    | 0.014                |

|    |         |            |     |                  |      |                  |      |                  |      |                  |       |                  |      |
|----|---------|------------|-----|------------------|------|------------------|------|------------------|------|------------------|-------|------------------|------|
| 8  | PPP1R3B | rs2126259  | T/C | 0.92 (0.67-1.26) | 0.61 | 1.02 (0.61-1.68) | 0.95 | 1.04 (0.60-1.82) | 0.88 | 0.49 (0.23-1.05) | 0.066 | 1.04 (0.64-1.68) | 0.88 |
| 1  | LDLRAP1 | rs12027135 | A/T | 0.95 (0.79-1.14) | 0.61 | 1.28 (0.95-1.72) | 0.10 | 0.91 (0.66-1.26) | 0.57 | 0.88 (0.50-1.55) | 0.65  | 0.89 (0.68-1.18) | 0.42 |
| 16 | HPR     | rs2000999  | A/A | 1.06 (0.85-1.32) | 0.62 | 1.13 (0.81-1.58) | 0.48 | 0.94 (0.63-1.40) | 0.74 | 1.12 (0.57-2.17) | 0.74  | 1.00 (0.72-1.39) | 1.00 |
| 12 | BRAP    | rs11065987 | G/A | 0.96 (0.80-1.15) | 0.65 | 0.96 (0.72-1.27) | 0.76 | 0.97 (0.71-1.32) | 0.84 | 1.16 (0.65-2.05) | 0.62  | 0.93 (0.71-1.23) | 0.61 |
| 1  | MOSC1   | rs2807834  | T/G | 0.96 (0.79-1.16) | 0.66 | 1.16 (0.84-1.60) | 0.38 | 0.90 (0.64-1.25) | 0.52 | 0.99 (0.53-1.85) | 0.98  | 0.87 (0.65-1.16) | 0.35 |
| 11 | ST3GAL4 | rs11220462 | A/A | 0.97 (0.75-1.27) | 0.84 | 0.85 (0.55-1.30) | 0.44 | 0.82 (0.51-1.34) | 0.43 | 0.77 (0.31-1.90) | 0.57  | 1.28 (0.89-1.85) | 0.18 |
| 20 | MAFB    | rs2902941  | G/A | 0.98 (0.81-1.19) | 0.86 | 0.97 (0.72-1.31) | 0.84 | 0.80 (0.58-1.11) | 0.19 | 1.08 (0.58-2.01) | 0.80  | 1.05 (0.79-1.40) | 0.73 |
| 20 | TOP1    | rs909802   | T/T | 1.00 (0.84-1.20) | 0.98 | 0.99 (0.74-1.32) | 0.95 | 0.91 (0.66-1.25) | 0.56 | 1.00 (0.57-1.76) | 0.99  | 1.05 (0.80-1.38) | 0.72 |

CHR, chromosome; CI, confidence interval; HLP, hyperlipoproteinemia; HTG, hypertriglyceridemia; Mb, megabases; NC, not calculated; OR, odds ratio; SNP, single nucleotide polymorphism; T2D, type 2 diabetes mellitus; TG, plasma triglyceride. The modeled allele is the TG-raising allele in the combined HTG cohort.

<sup>1</sup>Variant is monomorphic in HTG cases.

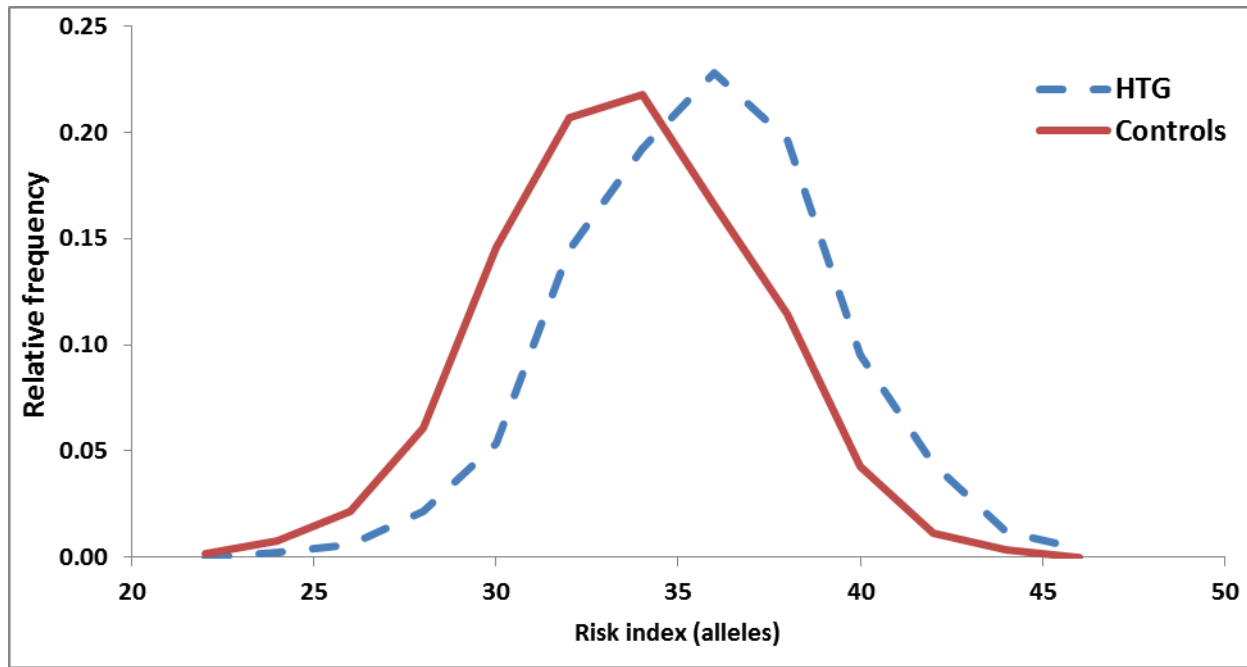

**Supplemental Figure I. Unweighted allelic TG scores are increased in polygenic HTG patients versus controls.** Allelic risk scores were constructed as the unweighted sum of 32 TG-associated loci.

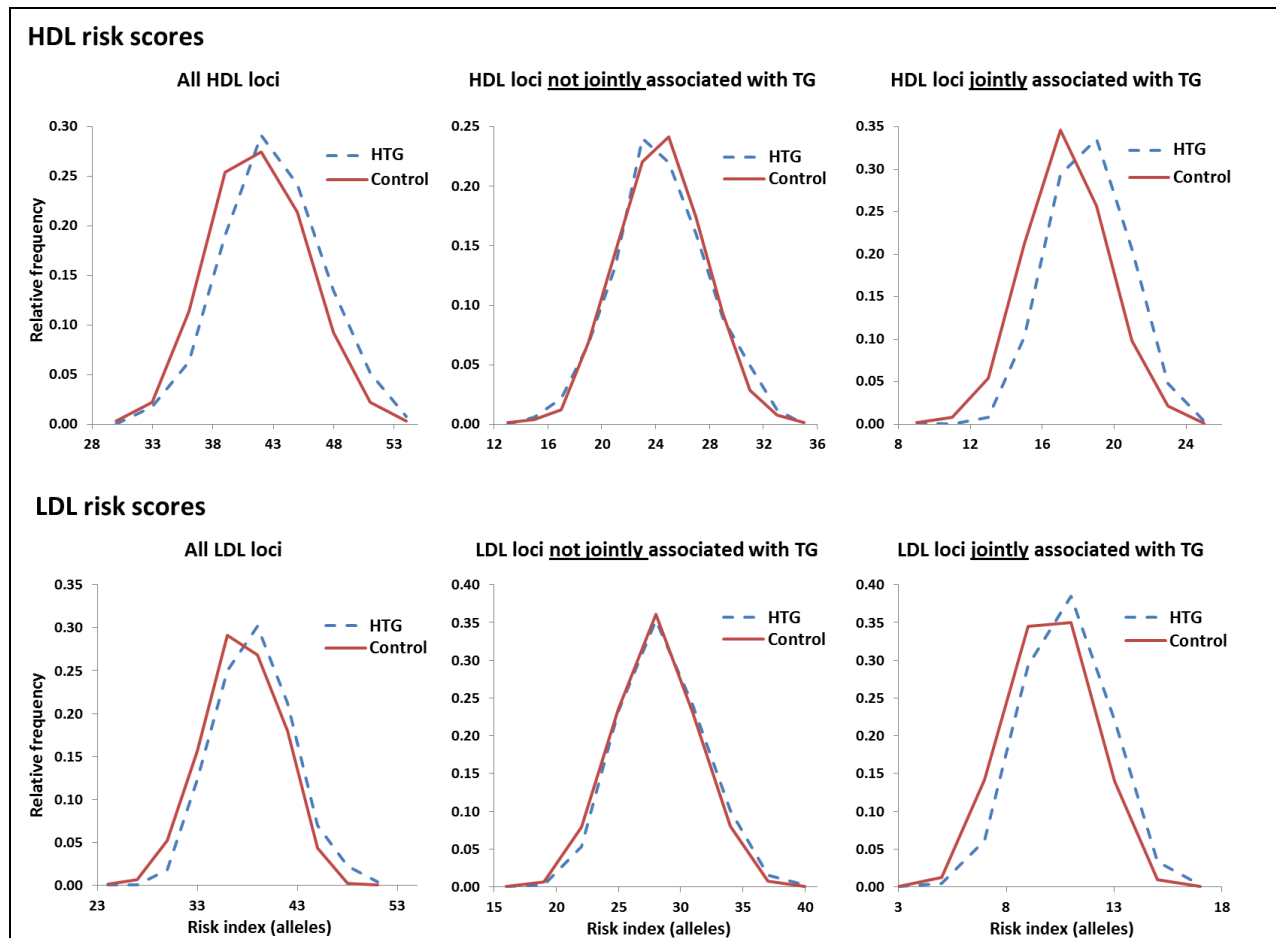

**Supplemental Figure II. Unweighted allelic HDL-C and LDL-C risk scores are increased in polygenic HTG patients versus controls and are driven primarily by loci jointly associated with plasma TG concentration.** Allelic risk scores were constructed as the unweighted sum of 47 HDL-C (top; left) or 37 LDL-C (bottom; left) associated loci. Unweighted risk scores were separated by loci associated only with HDL-C (top; middle) or LDL-C (bottom; middle), or loci jointly associated with plasma TG in addition to HDL-C (top; right) or LDL-C (bottom; right).



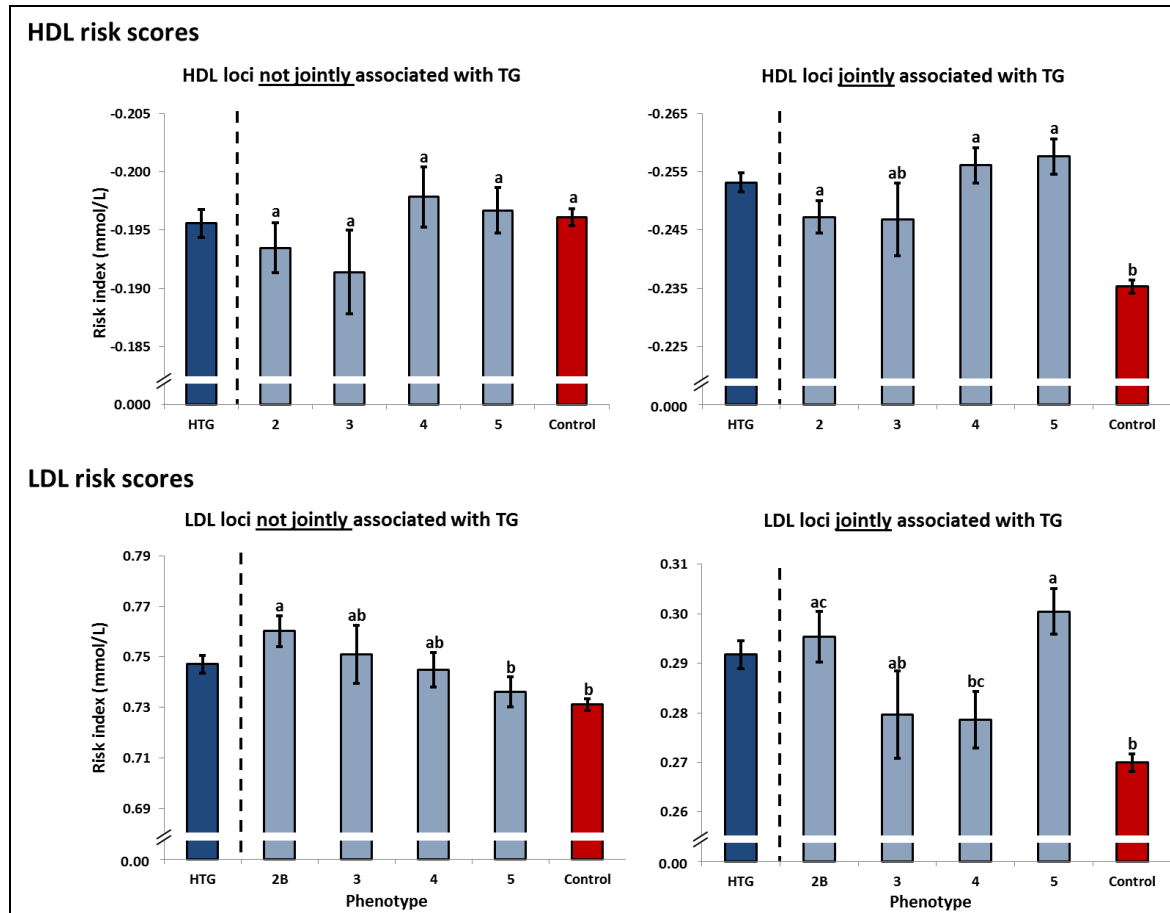

**Supplemental Figure III. Weighted allelic HDL-C and LDL-C risk scores have contributions from loci exclusively associated with HDL-C or LDL-C, and pleiotropic loci jointly associated with plasma TG concentration, causing differences among the polygenic HLP-HTG phenotypes.** Differences among weighted risk scores in HLP phenotypes and controls were assessed using ANOVA and *post hoc* pairwise comparisons using Tukey's test ( $P < 0.05$ ). Mean risk score in all HTG patients is provided as a reference only; it was not included in statistical comparisons. Values are mean  $\pm$  standard error; means sharing letters are not statistically different.

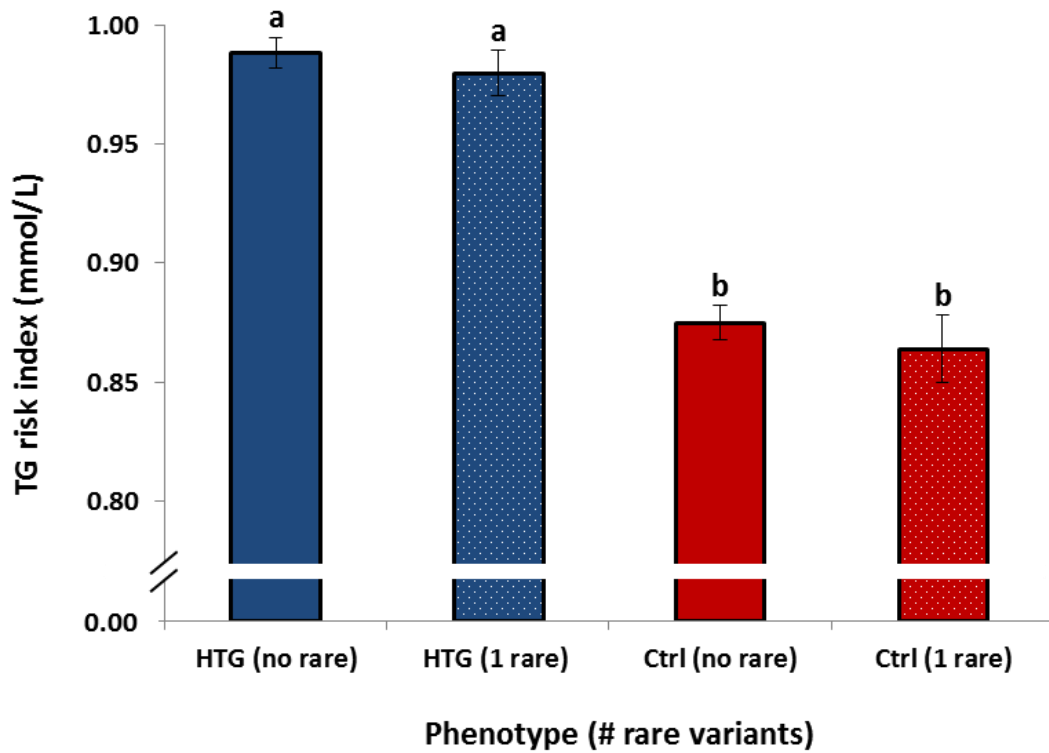

**Supplemental Figure IV. TG risk scores are similar between carriers and non-carriers of rare variants.** Differences among TG risk scores were assessed using ANOVA and *post hoc* pairwise comparisons using Tukey's test ( $P < 0.05$ ). Values are mean  $\pm$  standard error; means sharing letters are not statistically different. HTG, hypertriglyceridemia.
